# Supplementary material for: α-Synuclein accumulation and GBA deficiency due to L444P GBA mutation contributes to MPTP-induced parkinsonism
Source: Springer Nature journal article supplement (doi:10.1186/s13024-017-0233-5), 2018-01-08
Supplement: MOESM1 [file 15350102]

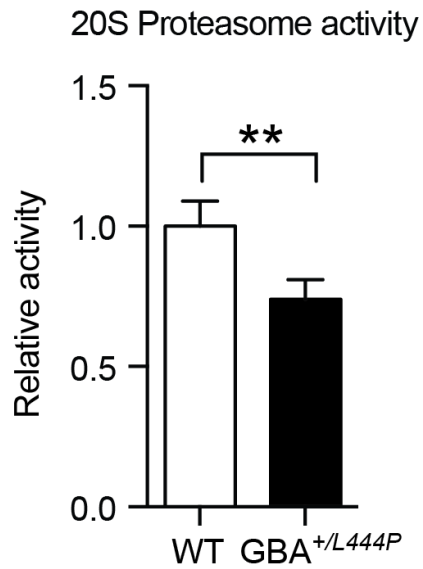

**Supplementary Figure 1.** Activity of 20S proteasome was measured in WT and GBA<sup>+/L444P</sup> primary cultured neurons (n= three per each group). Student's t-test was used to for statistical analysis. \* $P < 0.05$ , \*\*\* $P < 0.001$ .
