# Supplementary material for: α-Synuclein accumulation and GBA deficiency due to L444P GBA mutation contributes to MPTP-induced parkinsonism
Source: Springer Nature journal article supplement (doi:10.1186/s13024-017-0233-5), 2018-01-08
Supplement: MOESM2 [file 15350102]

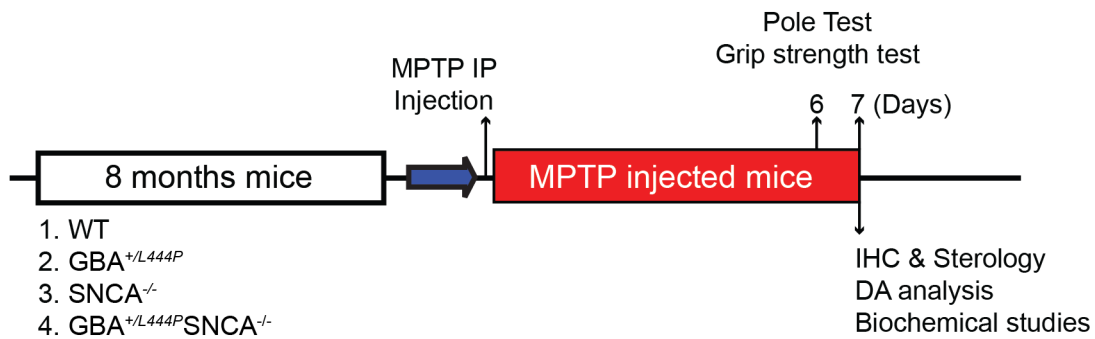

**Supplementary Figure 2.** The schematic diagram depicts the time schedule of intervention and analyses performed. Numerals represent the days experiments were conducted. On 1<sup>th</sup> day we injected saline or MPTP (2 h interval, 4 times, 20 mg/kg free base) in 8 months WT,  $GBA^{+/L444P}$ ,  $SNCA^{-/-}$ ,  $GBA^{+/L444P}SNCA^{-/-}$  mice. On 6th day, the pole and grip strength were performed. On 7th day, mice were sacrificed for indicated studies. Following are animal numbers used for these studies: behavioral (n=10), neurochemical (n=5), immunohistochemistry (n=5), and biochemical studies (n=4) per each treatment group.
