# Supplementary material for: α-Synuclein accumulation and GBA deficiency due to L444P GBA mutation contributes to MPTP-induced parkinsonism
Source: Springer Nature journal article supplement (doi:10.1186/s13024-017-0233-5), 2018-01-08
Supplement: MOESM3 [file 15350102]

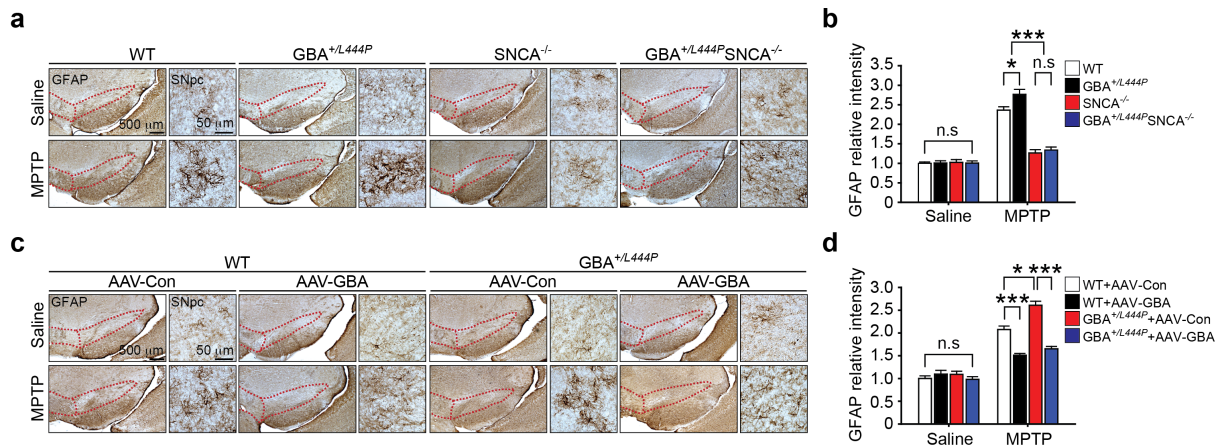

**Supplementary Figure 3.** Effect of  $\alpha$ -synuclein deficiency and GBA overexpression on susceptibility of GBA<sup>+L444P</sup> mice to MPTP-induced gliosis. **a, c** Representative images of immunohistochemistry data for GFAP with low (scale bar, 500  $\mu$ m) and high magnification (scale bar, 50  $\mu$ m). **b, d** Intensities of GFAP positive signals in the SNpc of mice treated with saline or MPTP were quantified and shown as a graph. Error bars represent the mean  $\pm$  S.E.M (n = four mice per group). Two-way ANOVA was used to test for statistical analysis followed by *post-hoc* Bonferroni test for multiple group comparison. \* $P < 0.05$ , \*\*\* $P < 0.001$  vs. MPTP-treated WT or GBA<sup>+L444P</sup> with AAV5-Con or MPTP-treated GBA<sup>+L444P</sup> with AAV5-Con. n.s: not significant.
