# Supplementary material for: α-Synuclein accumulation and GBA deficiency due to L444P GBA mutation contributes to MPTP-induced parkinsonism
Source: Springer Nature journal article supplement (doi:10.1186/s13024-017-0233-5), 2018-01-08
Supplement: MOESM4 [file 15350102]

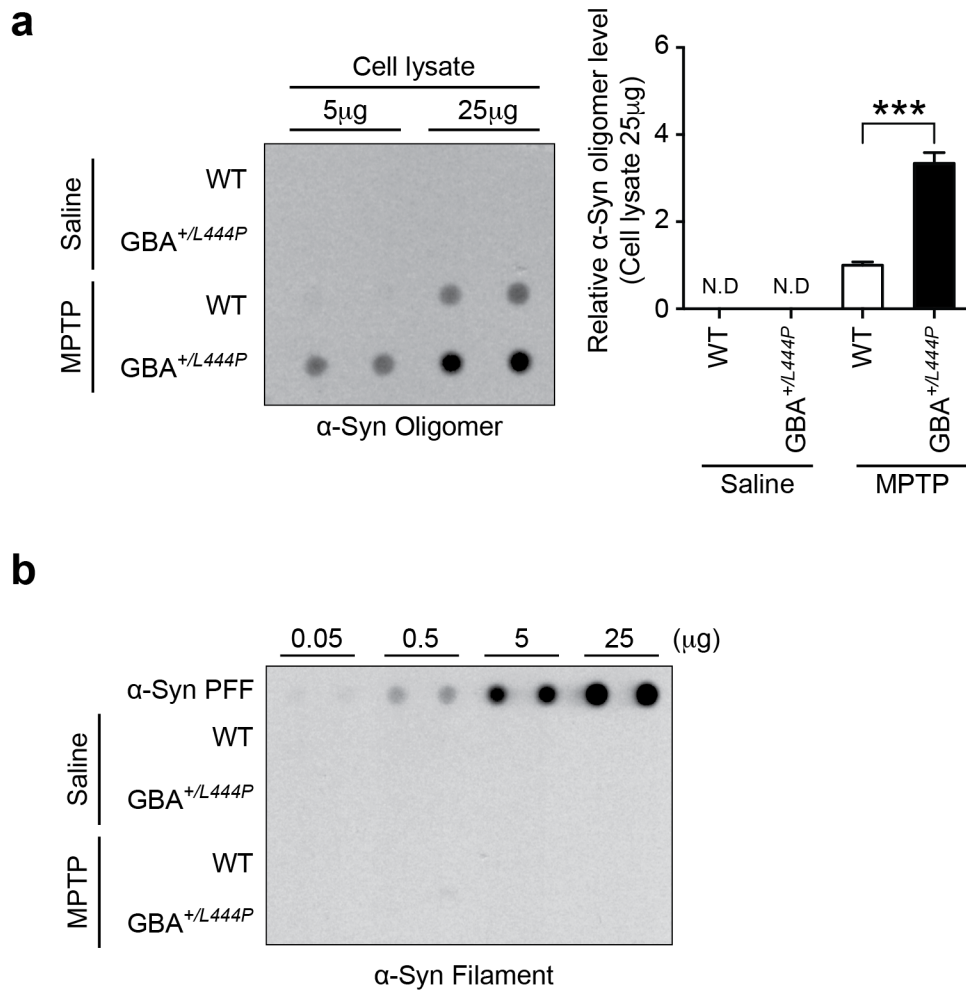

**Supplementary Figure 4.** MPTP-induced  $\alpha$ -synuclein oligomer. **a** Filter trap soluble- $\alpha$ -synuclein oligomer species assay from ventral midbrain of WT and GBA<sup>+/L444P</sup> mice with or without MPTP. Error bars represent the mean  $\pm$  S.E.M. (n = four mice per group). Two-way ANOVA was used for statistical analysis followed by *post-hoc* Bonferroni test for multiple group comparison. \*\*\* $P < 0.001$  vs. MPTP-treated WT. N.D: not detection. **b** Filter trap insoluble- $\alpha$ -synuclein filament species assay from ventral midbrain of WT and GBA<sup>+/L444P</sup> mice with or without MPTP.  $\alpha$ -Synuclein preformed fibril (PFF) is positive control.
