# Supplementary material for: α-Synuclein accumulation and GBA deficiency due to L444P GBA mutation contributes to MPTP-induced parkinsonism
Source: Springer Nature journal article supplement (doi:10.1186/s13024-017-0233-5), 2018-01-08
Supplement: MOESM8 [file 15350102]

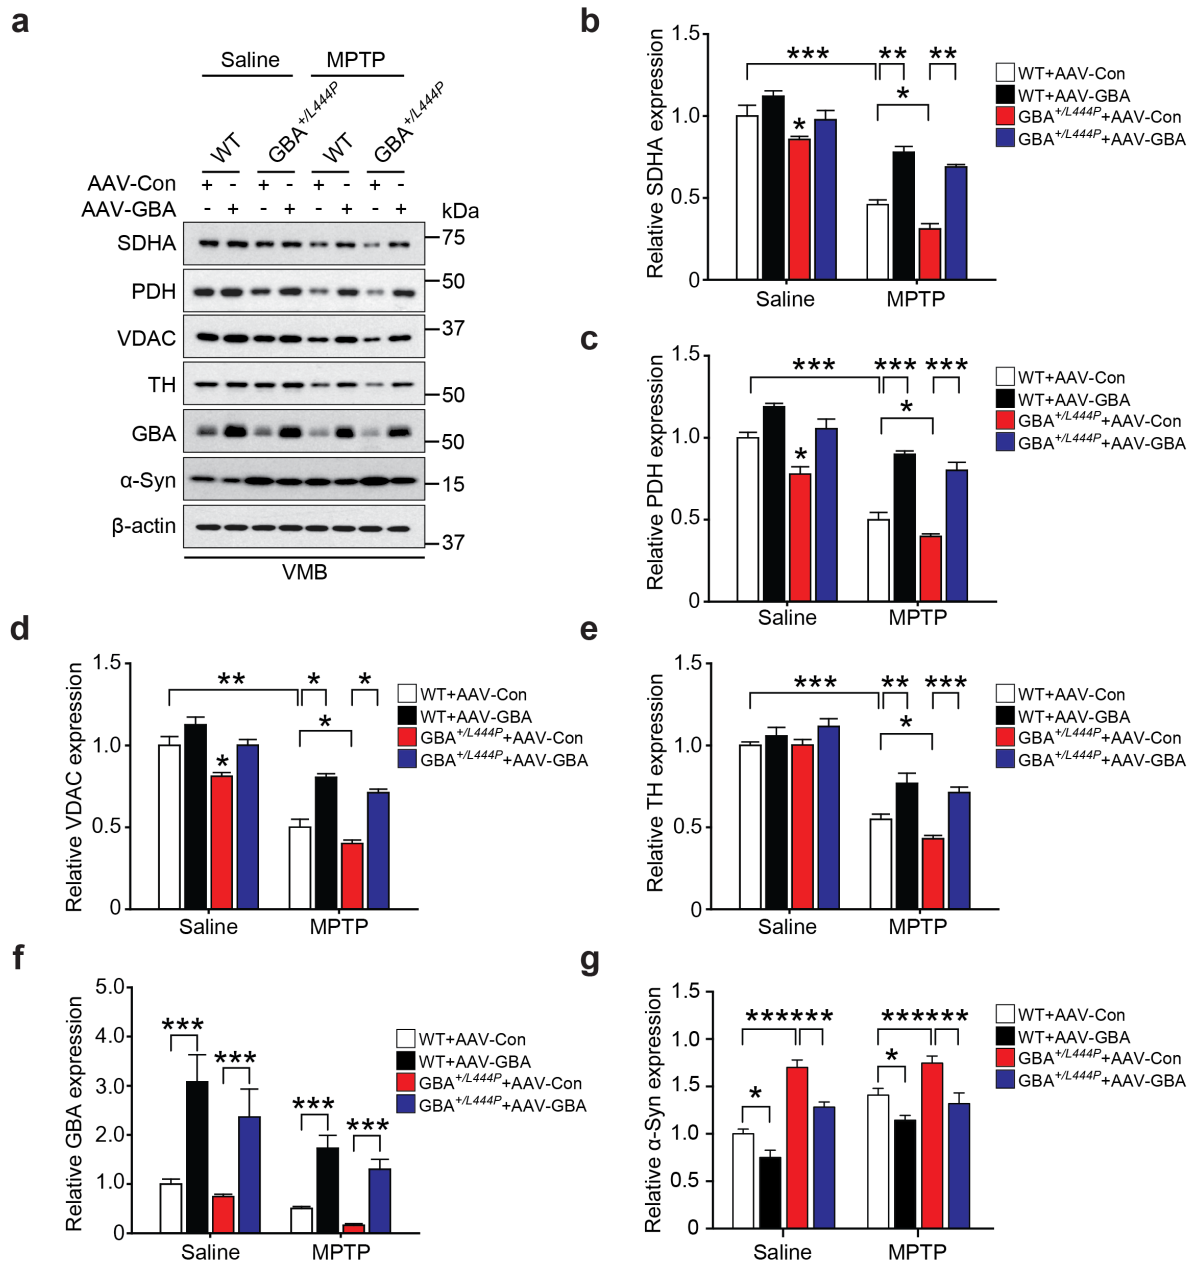

**Supplementary Figure 8.** GBA overexpression inhibits MPTP-reduced mitochondrial protein level in GBA<sup>+L444P</sup> mice. **a** Immunoblots of SDHA, PDH, VDAC, TH, GBA, and  $\alpha$ -synuclein from AAV5-Con injected WT, AAV5-hGBA injected WT, AAV5-Con injected heterozygous,

and AAV5-hGBA injected heterozygous mice treated with saline or MPTP. VMB lysates were immunoblotted with anti-SDHA, anti-PDH, anti-VDAC, anti-TH, and anti-GBA antibodies. **b** SDHA, **c** PDH, **d** VDAC, **e** TH, **f** GBA, and **g**  $\alpha$ -synuclein expression levels were normalized against  $\beta$ -actin. Error bars represent the mean  $\pm$  S.E.M. (n = three mice per group). Two-way ANOVA was used for statistical analysis followed by *post-hoc* Bonferroni test for multiple group comparison. \* $P < 0.05$ , \*\* $P < 0.01$ , \*\*\* $P < 0.001$  vs. saline-treated WT with AAV-Con or saline-treated GBA<sup>+/*L444P*</sup> with AAV5-Con or MPTP-treated WT with AAV5-Con or MPTP-treated GBA<sup>+/*L444P*</sup> with AAV5-Con group.
