# Supplementary material for: α-Synuclein accumulation and GBA deficiency due to L444P GBA mutation contributes to MPTP-induced parkinsonism
Source: Springer Nature journal article supplement (doi:10.1186/s13024-017-0233-5), 2018-01-08
Supplement: MOESM9 [file 15350102]

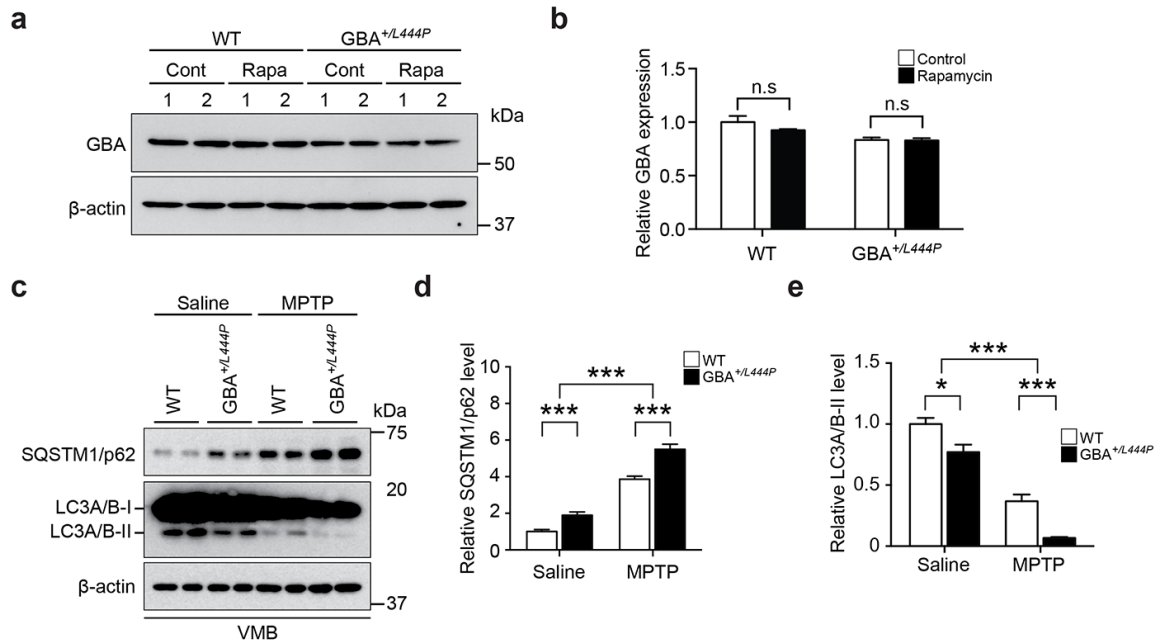

**Supplementary Figure 9.** L444P GBA heterozygous mutation leads to autophagy abnormality. **a, b** Effect of rapamycin on GBA<sup>+L444P</sup> expression. Primary cortical neurons were cultured from WT and GBA<sup>+L444P</sup> mice. After 10 DIV, primary neurons were treated with 20 nM of rapamycin (mTOR inhibitor for inducing autophagy) for 24 h. **a** Representative Immunoblots of GBA. **b** GBA expression levels were normalized against β-actin and the error bars represent the mean ± S.E.M (n = four per group). **c** Immunoblots of Autophagy marker proteins SQSTM1/p62, and LC3A/B-I/II. VMB lysates were immunoblotted with anti-SQSTM1/p62, and anti-LC3A/B-I/II antibodies. **d** SQSTM1/p62, and **e** LC3A/B-II expression levels were normalized against β-actin. Error bars represent the mean ± S.E.M (n = four mice per group). Two-way ANOVA was used for statistical analysis followed by *post-hoc* Bonferroni test for multiple group comparison. \**P* < 0.05, \*\**P* < 0.01, \*\*\**P* < 0.001. n.s: not significant.
